# Supplementary material for: Developing mathematical model for diurnal dynamics of photosynthesis in Saccharum officinarum responsive to different irrigation and silicon application
Source: PubMed Central journal article supplement (PMC7597626; doi:10.7717/peerj.10154), 2020-10-27
Supplement: peerj-08-10154-s001.pdf [file peerj-08-10154-s001.pdf]

## Manuscript title

Developing mathematical model for diurnal dynamics of photosynthesis in *Saccharum officinarum* responsive to different irrigation and silicon application

## Name(s) of the author(s)

Krishan K. Verma<sup>1</sup>, Kai-Chao Wu<sup>1</sup>, Chhedi Lal Verma<sup>2</sup>, Dong-Mei Li<sup>1</sup>, Mukesh Kumar Malviya<sup>1</sup>, Rajesh Kumar Singh<sup>1</sup>, Pratiksha Singh<sup>1</sup>, Gan-Lin Chen<sup>3</sup>, Xiu-Peng Song<sup>1,\*</sup>, Yang-Rui Li<sup>1,\*</sup>

## Affiliation(s) and address(es) of the author(s)

<sup>1</sup>Key Laboratory of Sugarcane Biotechnology and Genetic Improvement (Guangxi), Ministry of Agriculture and Rural Affairs/ Guangxi Key Laboratory of Sugarcane Genetic Improvement/ Sugarcane Research Institute, Guangxi Academy of Agricultural Sciences, Nanning - 530 007, China; [drvermakishan@gmail.com](mailto:drvermakishan@gmail.com); ORCID – 0000-0002-5501-7905 (KKV), [kaichaowu@126.com](mailto:kaichaowu@126.com) (K.C.W), [Domi\\_li@163.com](mailto:Domi_li@163.com) (D.M.L.), [rajeshsingh999@gmail.com](mailto:rajeshsingh999@gmail.com) (R.K.S.), [singh.pratiksha23@gmail.com](mailto:singh.pratiksha23@gmail.com) (P.S.), [mkshmalviya@yahoo.com](mailto:mkshmalviya@yahoo.com) (M.K.M.)

<sup>2</sup>Central Soil Salinity Research Institute (RRS), Lucknow – 226 005, India; [lalc\\_verma@yahoo.com](mailto:lalc_verma@yahoo.com)

<sup>3</sup>Institute of Biotechnology, Guangxi Academy of Agricultural Sciences, Nanning - 530 007, China; [ganlin-chen@163.com](mailto:ganlin-chen@163.com) (G.L.C.)

\*Corresponding: [xiupengsong@163.com](mailto:xiupengsong@163.com) (X.P.S.); [liyr@gxaas.net](mailto:liyr@gxaas.net) (Y.R.L.);

Tel.: +86-18677128565 (X.P.S); 13807883389 (Y.R.L.);

ORCID: 0000-0002-7559-9244 (Y.R.L.)

**Supplementary file**

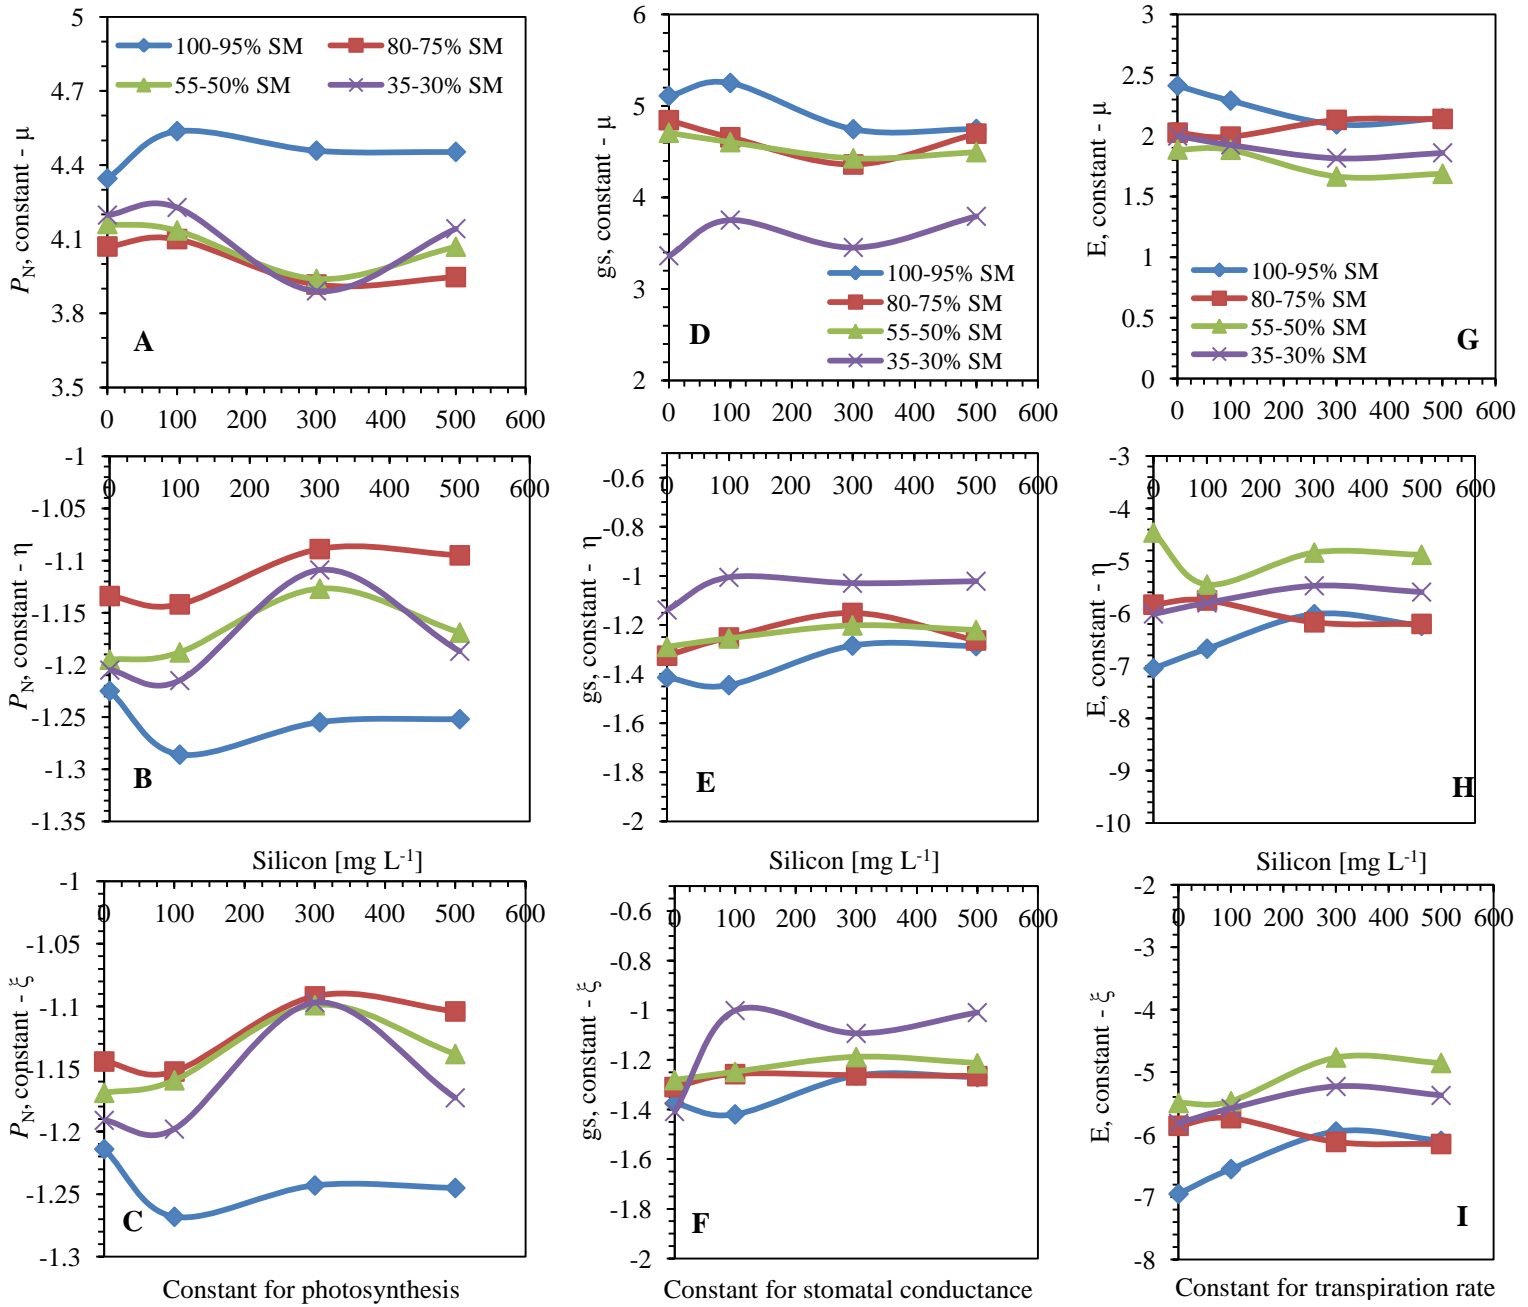

Fig. 1S: Model constants for photosynthesis (A-C), stomatal conductance (D-F) and transpiration rate (G-I).

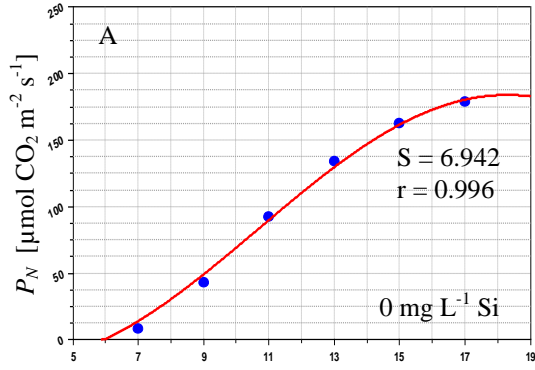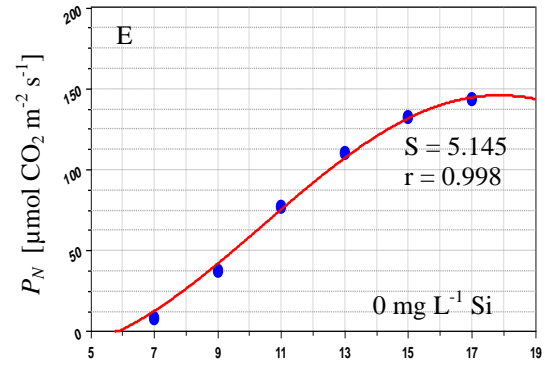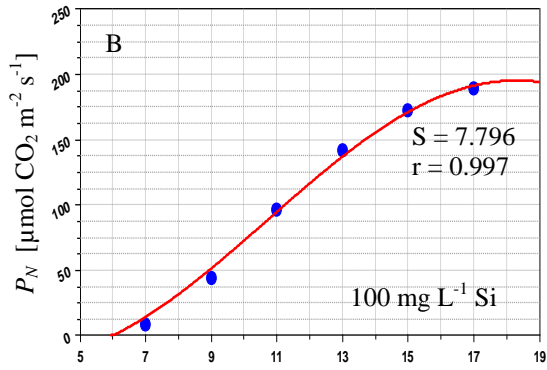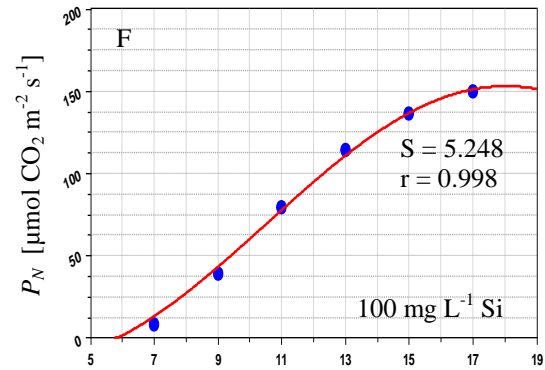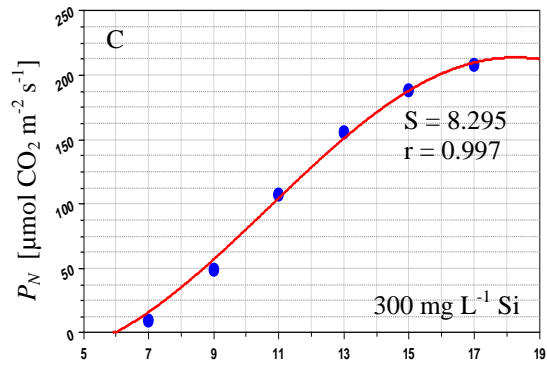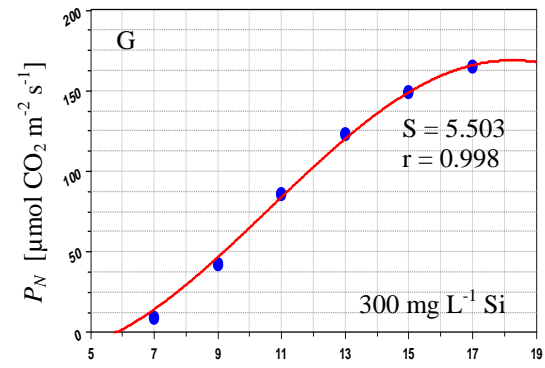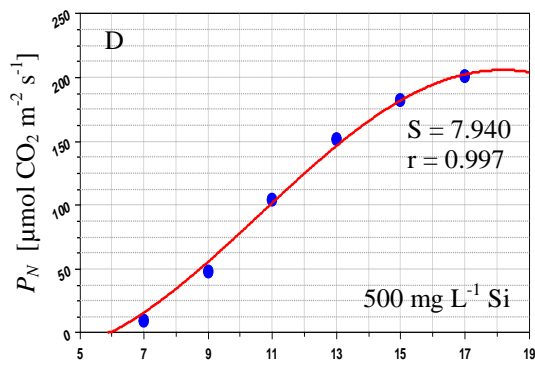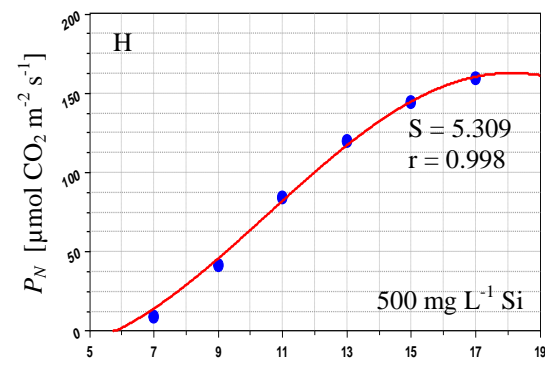

Cumulative time (h) - Control

Cumulative time (h) - Mild stress

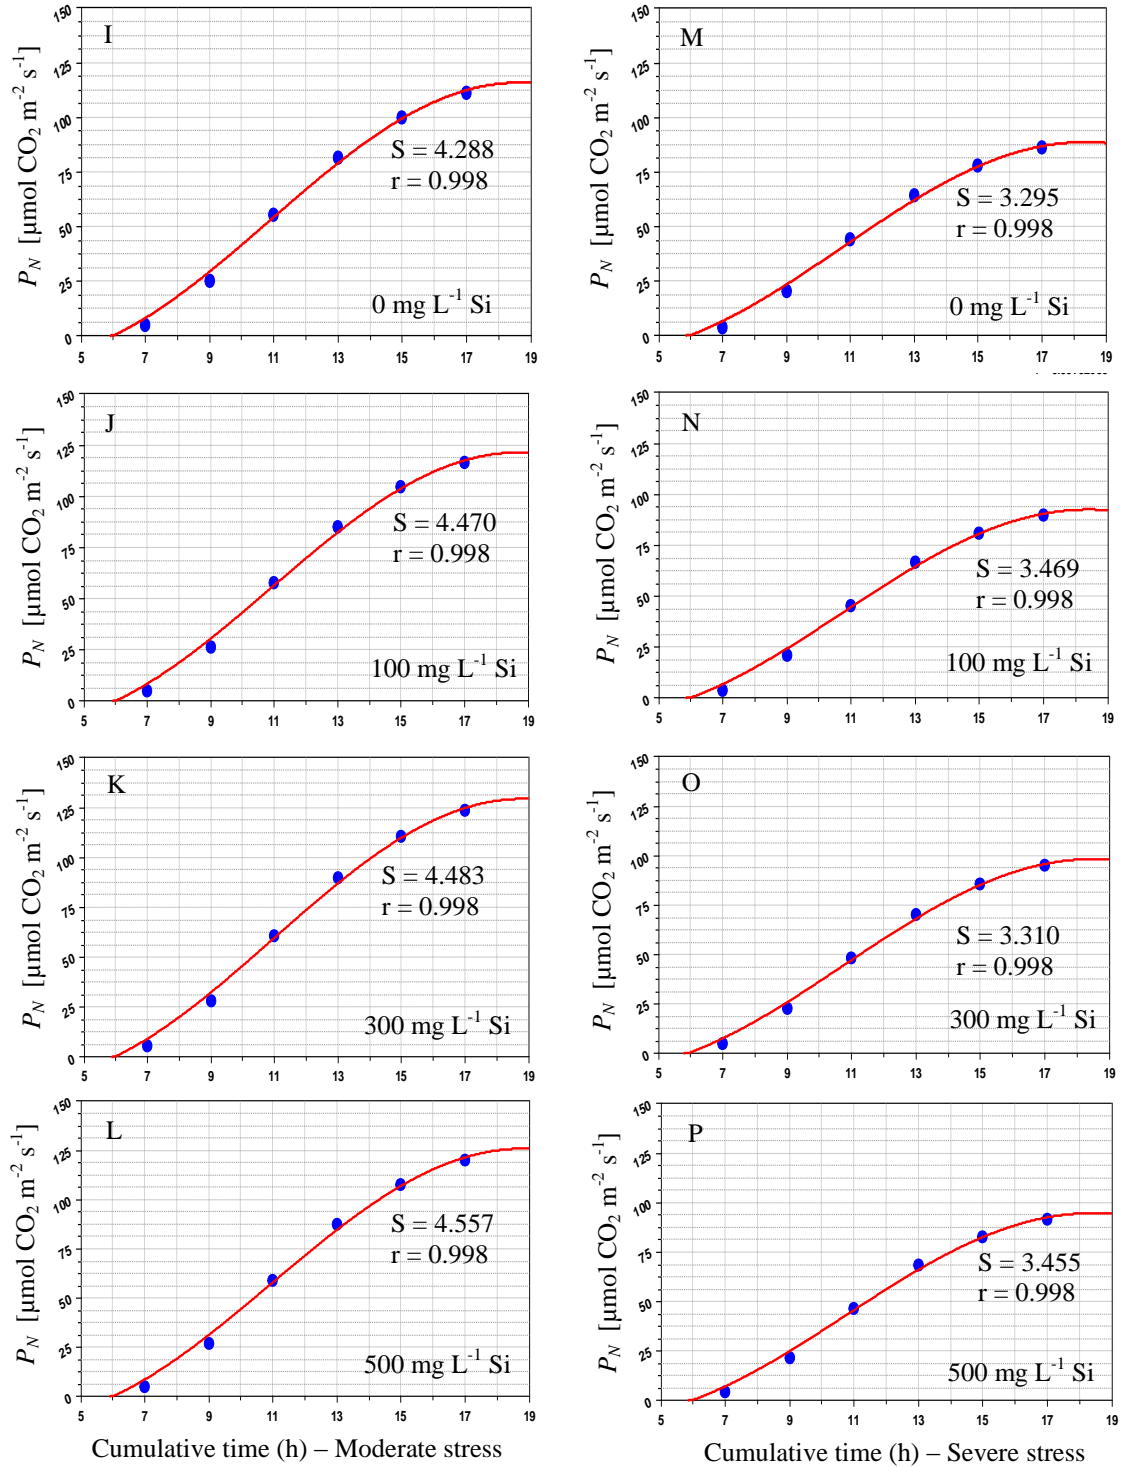

Fig. 2S: Cumulative diurnal variation of photosynthesis ( $P_N$ ,  $\mu\text{mol CO}_2 \text{ m}^{-2} \text{ s}^{-1}$ ) in *Saccharum officinarum* plant leaves under control (A-D) and limited water supply [mild (E-H), moderate (I-L), and severe stress (M-P)] with different silicon levels (0, 100, 300 and 500  $\text{mg L}^{-1}$ ) application.  $S$  = standard error,  $r$  = correlation coefficient.

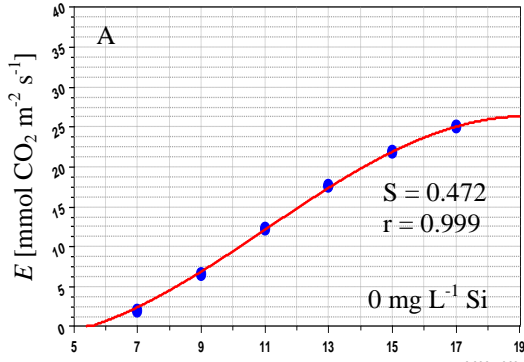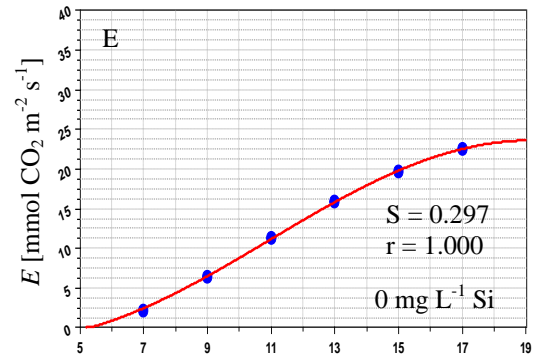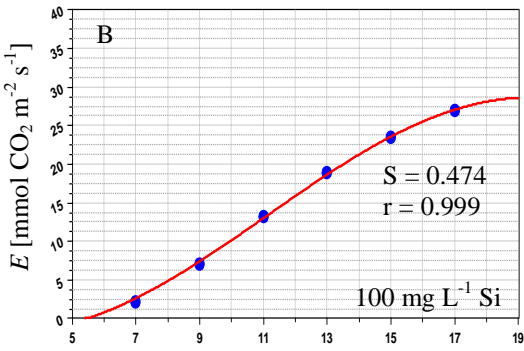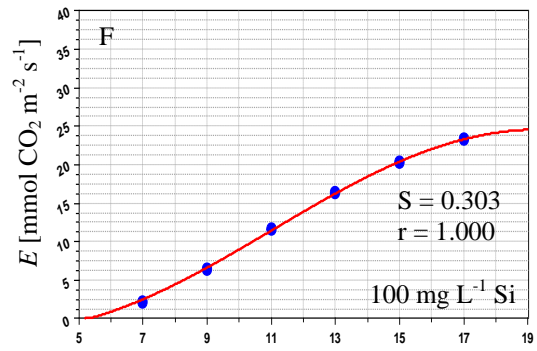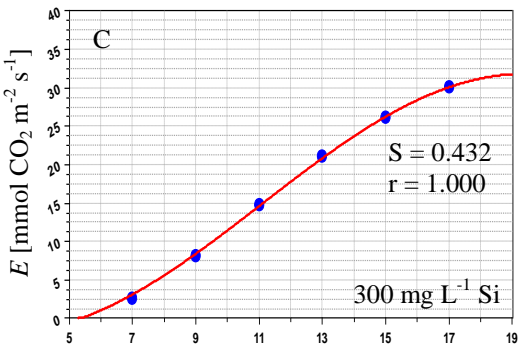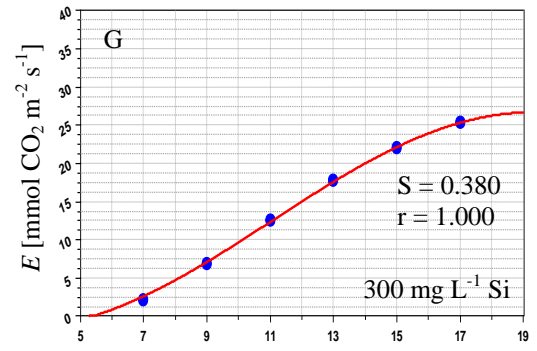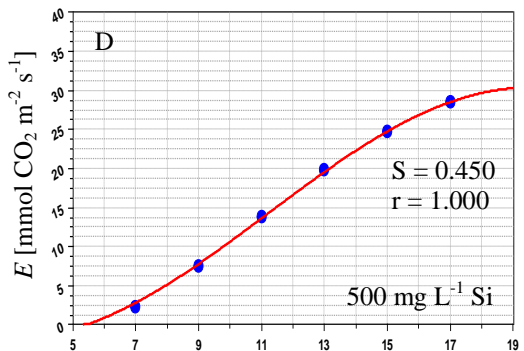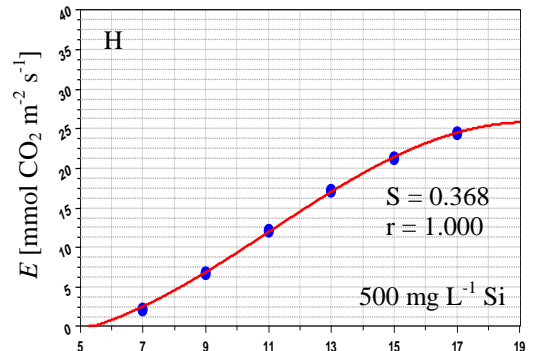

Cumulative time (h) – Control

Cumulative time (h) – Mild stress

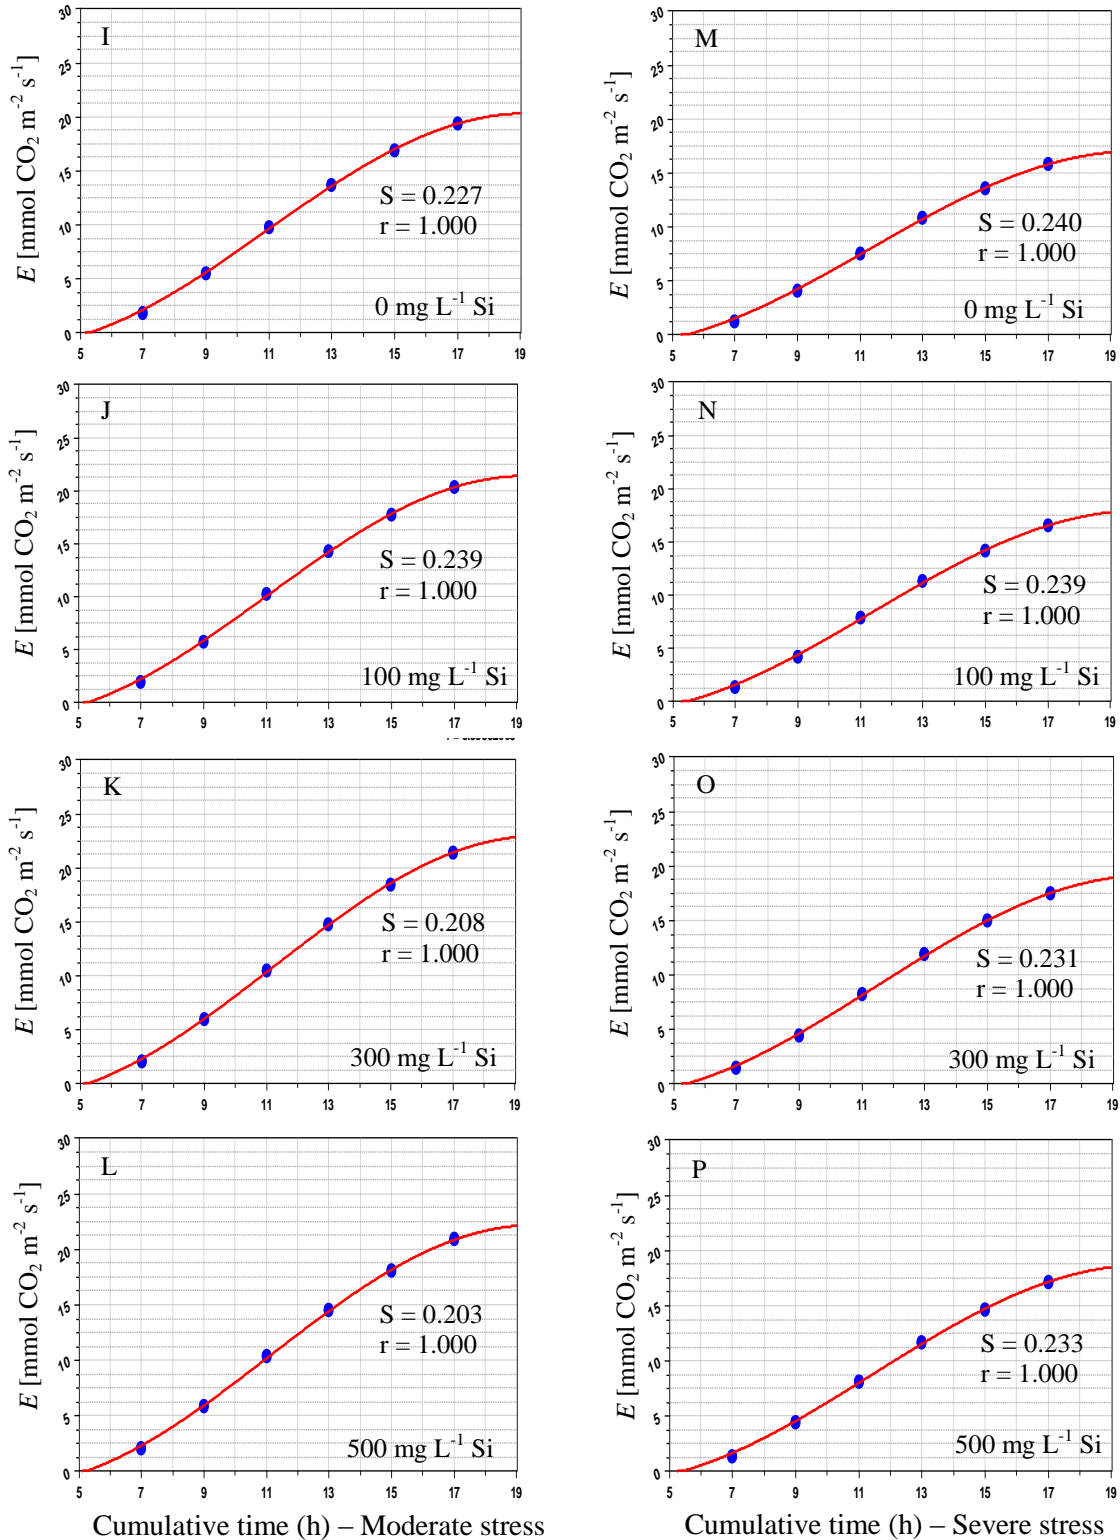

Fig. 3S: Cumulative diurnal variations of transpiration rate ( $E$ ,  $\text{mmol CO}_2 \text{ m}^{-2} \text{ s}^{-1}$ ) in *Saccharum officinarum* plant leaves under control (A-D) and limited water supply [mild (E-H), moderate (I-L), and severe stress (M-P)] with different levels of silicon ( $0, 100, 300$  and  $500 \text{ mg L}^{-1}$ ) application.  $S$  = standard error,  $r$  = correlation coefficient.

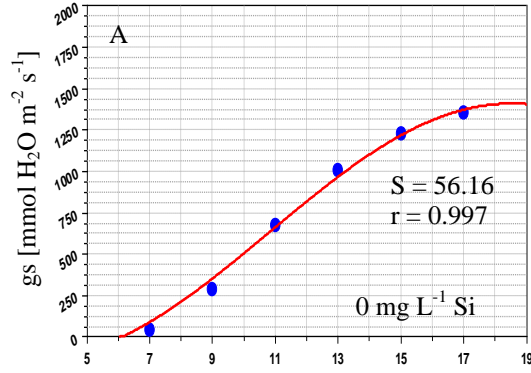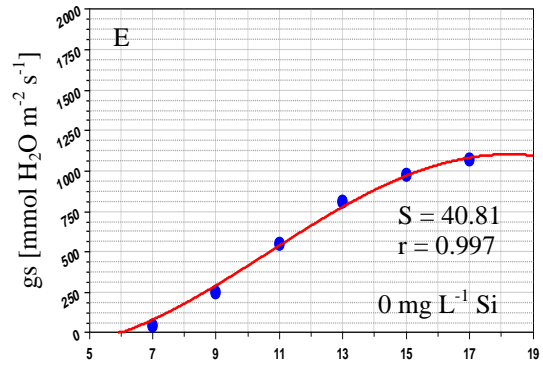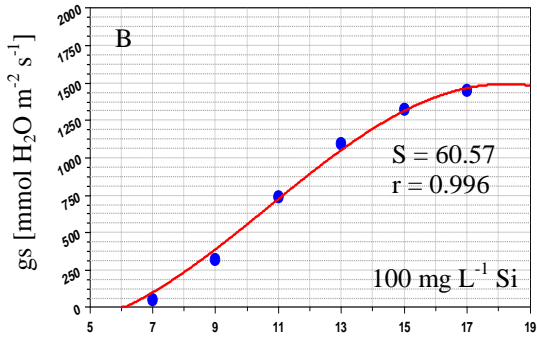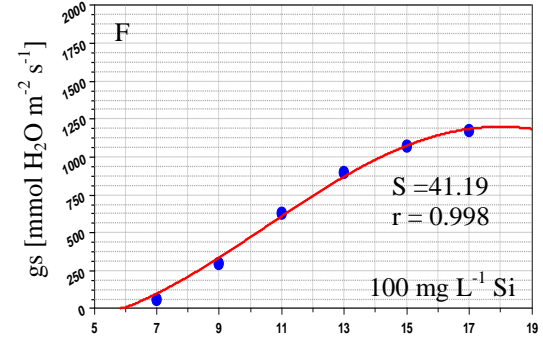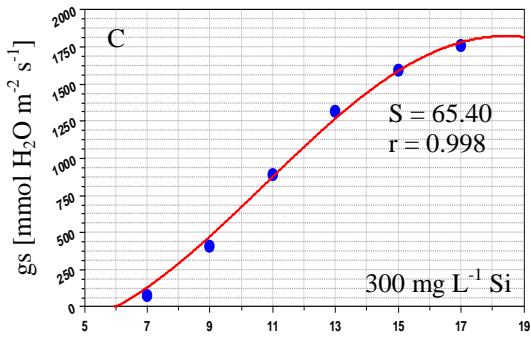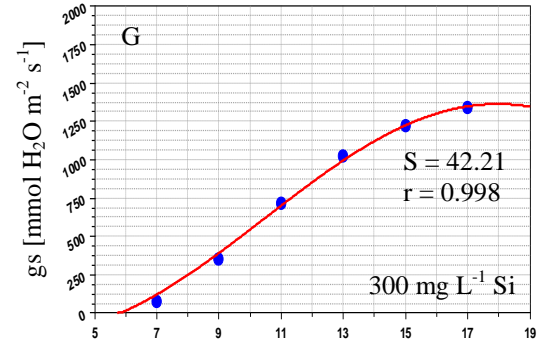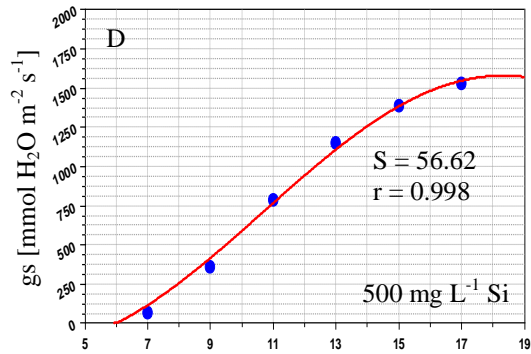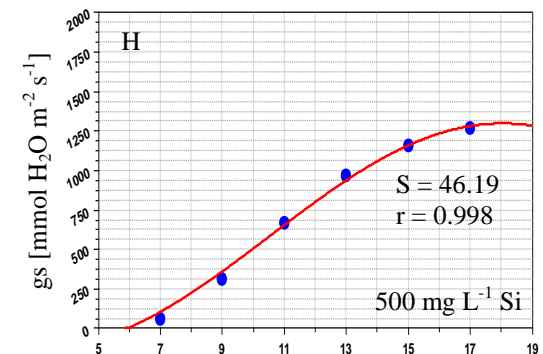

Cumulative time (h) – Control

Cumulative time (h) – Mild stress

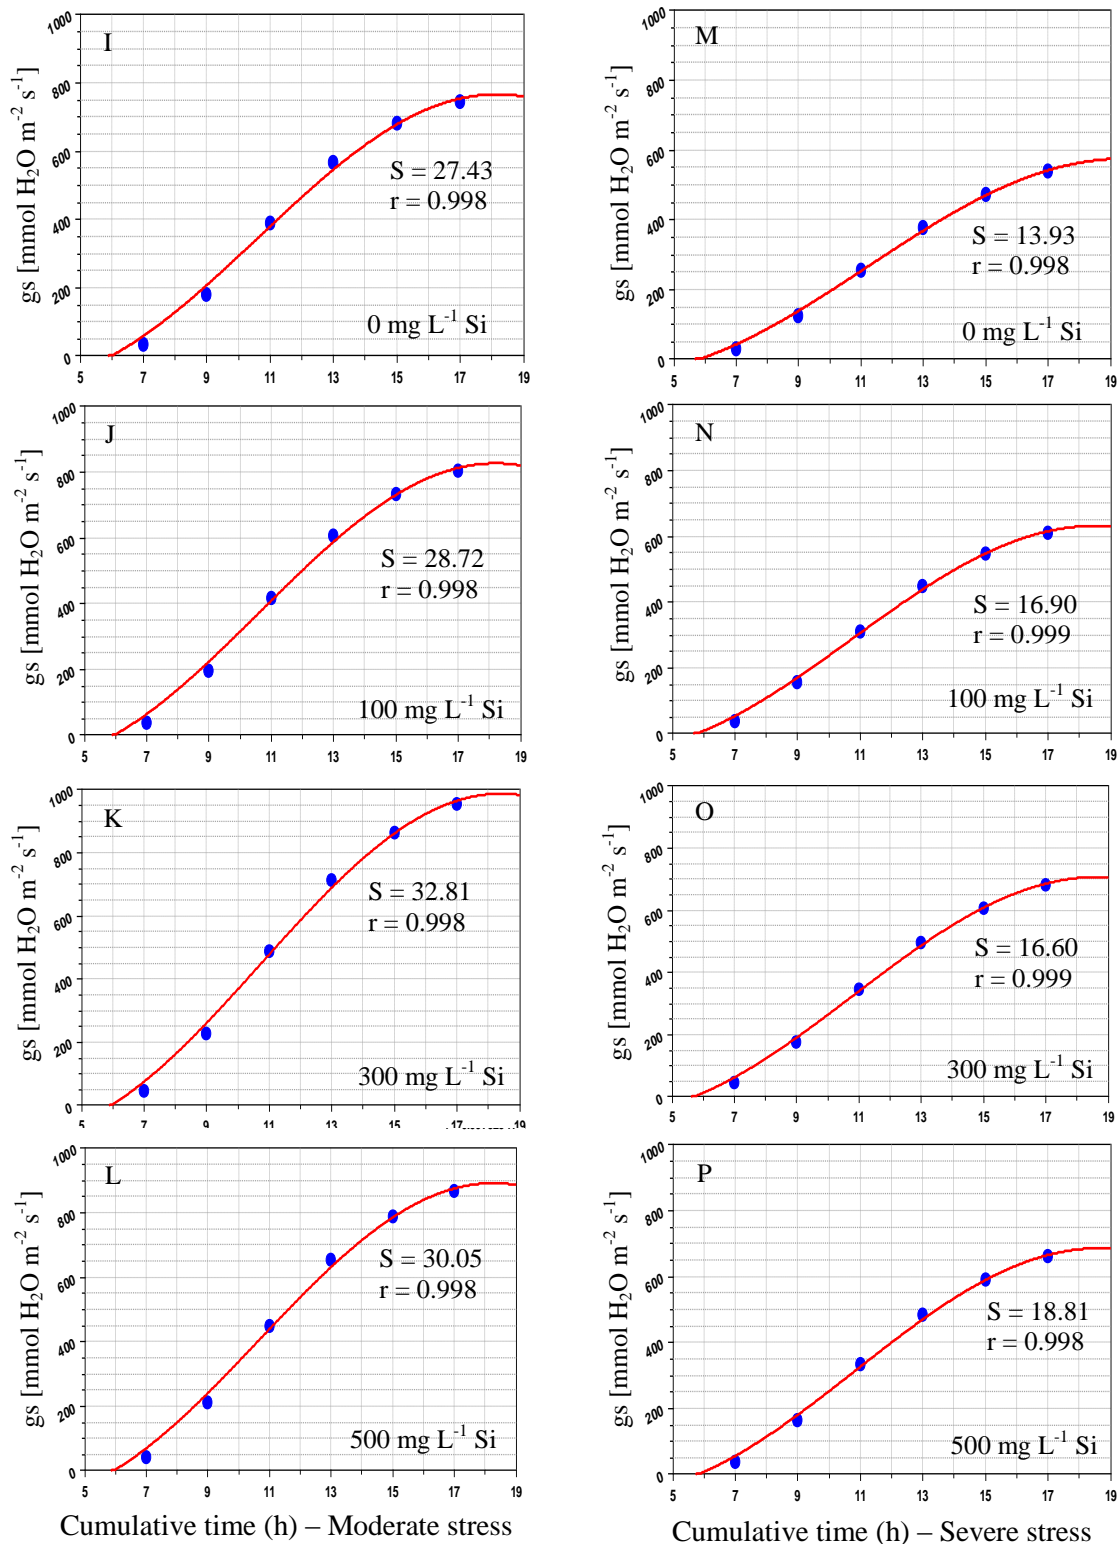

Fig. 4S: Cumulative diurnal variations of stomatal conductance ( $g_s$ ,  $\text{mmol H}_2\text{O m}^{-2} \text{s}^{-1}$ ) in *Saccharum officinarum* plant leaves under control (A-D) and limited water supply [mild (E-H), moderate (I-L), and severe stress (M-P)] with different levels of silicon (0, 100, 300 and 500  $\text{mg L}^{-1}$ ) application. S = standard error, r = correlation coefficient.
